31 Surveying the Literature on Implementation Determinants and Strategies for HIV Structural

32 Interventions: A Systematic Review Protocol

33 **Abstract**

34 **Background:** Despite improvements in HIV prevention, treatment, and surveillance, vast  
35 disparities remain in access, uptake, and adherence of evidence-based interventions. These  
36 disparities are most pronounced among racially, sexually, and gender minoritized populations, as  
37 well as among those living in poverty and/or who use injectable drugs. Structural interventions,  
38 or interventions that target social and structural determinants of health like housing,  
39 transportation, or income, are needed to increase access to, use of, and adherence to HIV EBIs to  
40 advance the aims of the national Ending the HIV Epidemic initiative. However, it is unclear to  
41 what extent barriers and facilitators of structural interventions have been identified in the U.S.  
42 and what implementation strategies and adjunctive interventions have been developed to enhance  
43 their delivery.

44 **Methods:** To identify what implementation determinants, implementation strategies, and  
45 adjunctive interventions have been identified for HIV structural interventions, we carried out a  
46 broad database search between May and July 2024, identifying a total of 8,098 articles. We will  
47 use a multi-step process to identify articles to include in the systematic review. We will use  
48 natural language processing to identify articles for exclusion, followed by manual text review  
49 and extraction using COVIDENCE software. Literature on determinants will be coded according  
50 to the Consolidated Framework for Implementation Research. Implementation strategies and  
51 adjunctive interventions will be coded according to the Expert Recommendations for  
52 Implementing Change, the Theoretical Domains Framework, and COM-B. We will descriptively  
53 analyze determinants, implementation strategies, and adjunctive interventions, use natural  
54 language processing for thematic analysis of determinants, implementation strategies, and

55 adjunctive interventions, and provide narrative description of implementation strategies and

56 adjunctive interventions.

57 **Discussion:** This systematic review will identify key barriers and facilitators for HIV structural

58 intervention implementation strategies, including multi-level approaches to address disparities

59 among marginalized populations. Findings will provide insights for advancing equitable, scalable

60 interventions to support the goals of the Ending the HIV Epidemic initiative.

61 **Systematic review registration:** CRD42024554315

62

63 **Keywords:** Systematic Review; Protocol Paper; HIV/AIDS; Structural Intervention;

64 Implementation Science

65

66

67

68

69

70

71

72

73

74

75

76

77

78

## 79 **Background**

80 The HIV epidemic disproportionately impacts minoritized populations, underscoring the need  
81 to examine the social and structural determinants of health (SSDOH) that contribute to these  
82 inequities (1,2). SSDOH include the “upstream” or structural factors like public policy,  
83 economic context, social and cultural values, and political ideology that produce or give shape to  
84 social determinants of health (3). SSDOH, thus, also include the more “mid-stream” or social  
85 factors, often referred to as the conditions where individuals work, live, grow, and play, that  
86 shape a populations’ health before individuals step foot in a clinic (3). The federal government  
87 has identified “key populations” that are disproportionately affected by the HIV epidemic due, in  
88 part, to SSDOH: cisgender gay, bisexual, and other men who have sex with men of all races and  
89 ethnicities (MSM); Black women people who inject drugs (PWID); youth aged 13 to 24 years;  
90 and transgender women (4). Despite improvements in overall HIV incidence due to the  
91 development and implementation of numerous evidence-based interventions (EBIs), trends in the  
92 United States highlight the disparities between these groups and the general population (5). For  
93 example, between 2018 and 2022, new HIV diagnoses in Black, Indigenous, Hispanic/Latine,  
94 and Native Hawaiian or Pacific Islander populations increased, but decreased or stabilized in  
95 Asian and White populations, respectively (5). SSDOH such as racism, access to care, economic  
96 status, and social stigma can all contribute to discrepancies in HIV diagnosis, treatment, and  
97 prevention rates (6).

98 Pre-exposure prophylaxis (PrEP), an oral pill or bimonthly injection that significantly reduces  
99 the risk of acquiring HIV (7–9), is a critical tool in HIV prevention, but disparities in access and  
100 uptake present significant challenges. For example, PrEP uptake has been slow among Black and  
101 Latine individuals, particularly Black females and Latino males (10,11). Barriers such as stigma,

102 medical mistrust, and structural racism contribute to the inequitable distribution of PrEP, limiting  
103 its full potential in reducing HIV incidence (12).

104 Treatment as Prevention, another critical innovation, involves the suppression of individuals'  
105 HIV viral load through consistent antiretroviral therapy (ART) adherence and has emerged as a  
106 highly effective strategy in preventing the transmission of HIV through sex, syringe sharing, and  
107 vertical (mother-to-child) transmission (13–18). However, barriers to access to care and to ART  
108 adherence remain prevalent among key populations, including housing instability, lack of access  
109 to transportation, substance use, which each, without further patient support, contribute to  
110 patients missing a greater number of clinic appointments (19).

111 Achieving the goals of the Ending the HIV Epidemic in the US (EHE) Initiative to reduce  
112 HIV incidence and improve health equity necessitates the implementation of structural  
113 interventions (20). Structural interventions attempt to make changes to the performance and  
114 creation of public health initiatives (21). These interventions target the structural factors of a  
115 public health initiative that can influence the target population's behavior. The structural factors  
116 (or determinants) influencing health behaviors can include social inequalities, economic factors,  
117 cultural influences, policies, and physical structures (21). Structural interventions have been used  
118 as a preventative strategy to target the structural variables that impact behavior and risk of  
119 obtaining HIV. For example, the provision of housing as an intervention has been found to  
120 reduce engagement in sexual and substance use behaviors that may increase the likelihood of  
121 acquiring HIV, as well as to increase access and adherence to ART (22).

122 While a growing body of literature has attended to developing and piloting structural  
123 interventions, there has been less attention to their implementation within the U.S.  
124 Implementation science has identified a persistent gap between the development, piloting, and  
125 trialing of an EBI and its eventual implementation (referred to as the implementation gap (23)).

126 Thus, it is necessary for researchers to identify the implementation determinants, or barriers and  
127 facilitators, of structural interventions and the implementation strategies or processes, methods,  
128 policies, and programs to increase the reach, effectiveness, adoption, implementation, and  
129 sustainability of the interventions (24–27). Structural interventions will also likely require the  
130 identification and development of adjunctive interventions, or methods to increase patient  
131 uptake, access, and adherence to the intervention (28). Implementation science’s focus on swift  
132 translation of research to practice is necessary to achieve the goals of the EHE initiative (29).

133 Thus, we aim to carry out a systematic review to identify:

- 134 1. What implementation determinants, implementation strategies, and adjunctive  
135 interventions have been identified as relevant to the adoption, acceptability,  
136 feasibility, appropriateness, reach, cost, sustainability, and equitable delivery of  
137 structural interventions for HIV EBIs?
- 138 2. What gaps are present in the literature regarding the implementation of structural  
139 interventions for HIV EBIs?
- 140 3. How are or how may structural interventions be differentiated from implementation  
141 strategies and adjunctive interventions?

## 142 **Methods**

### 143 *Search Strategy*

144 Between May and July 2024, a broad database search strategy (see **Supplemental File 1**) was  
145 carried out to identify literature focused on implementation determinants, implementation  
146 strategies, and adjunctive interventions for structural interventions for HIV EBIs along the HIV  
147 prevention and care continua (30,31). The protocol for this search is registered with the  
148 International Prospective Register of Systematic Reviews (PROSPERO ID: CRD42024554315).  
149 A research librarian provided consultation on the search strategy and recommended additional

150 databases to search. The first author (az) searched Ovid MEDLINE [2000-2024], Embase  
151 (Elsevier) [2000-2024], PsycINFO (EbscoHost) [2000-2024], Web of Science [2000-2024],  
152 Sociological Abstracts [2000-2024], Google [All years], and ProQuest Congressional CRS  
153 Reports and Miscellaneous Publications [2000-2024]. The second author (VAD) also identified  
154 the primary sources from the CDC's compendium of evidence based structural interventions for  
155 HIV to add to the initial search (32). From this, 8,098 articles were identified before duplication.  
156 Using these articles, we will conduct a systematic review in two phases: 1) identifying  
157 implementation determinants and 2) identifying implementation strategies and adjunctive  
158 interventions. Both phases of the systematic review will be carried out in compliance with the  
159 Preferred Reporting Items for Systematic Reviews and Meta-Analyses (PRISMA; see  
160 **Supplemental File 2**).

#### 161 *Screening and eligibility criteria*

162 We used a multi-step process to identify articles to include in the systematic review. Inclusion  
163 criteria include: 1) a focus on HIV/AIDS; 2) 50% or more of the study sample is based in the  
164 U.S.; 3) the study is an implementation or hybrid implementation-effectiveness study (33); 4) the  
165 study contains original research with an original data sample; 5) behavioral or social science  
166 (i.e., not basic science); 6) the study reports, explores, or tests at least one implementation  
167 outcome (i.e., acceptability, feasibility, adoption, fidelity, implementation costs, reach,  
168 sustainability (26,27)); and 7) that the intervention either (a) affects risks and/or behavioral  
169 choices by changing something external to the individual and not under their control and/or (b)  
170 targets social determinants of health.

171 Preliminary inclusion was determined using natural language processing (NLP) to analyze  
172 titles and abstracts (N = 8,092) and classify articles for eligibility in our systematic review. NLP  
173 was performed by author MH using R version 4.4.1 (34) and packages *quanteda* for quantitative

174 analysis of textual data (35), RWeka for machine learning algorithms for data mining (36), and  
175 tidyverse (37), tidytext (38), broom (39), readr (40), stringr (41), and magrittr (42) for data  
176 cleaning and manipulation. Five domains, with separate R scripts, were defined: 1) Domestic  
177 Setting (i.e., not international or foreign); 2) Study Design; 3) Behavioral Science; 4) HIV/AIDS  
178 Relevance; and 5) Structural Intervention. Using the quanteda package in R, each article was  
179 assigned a label for inclusion, exclusion, further inspection required, or no label based on the  
180 quantified presence of predetermined terms. 405 articles were assigned an ‘include’ label across  
181 all five domain classifiers, and 4,285 articles contained at least one ‘further inspection’ label and  
182 were not assigned an ‘exclude’ label across any classifier. Lastly, results were output into a table  
183 indicating the classification of each article.

184 After computerized exclusion, articles identified for inclusion in the NLP were uploaded to  
185 COVIDENCE for manual review (43). COVIDENCE will automatically identify duplicate  
186 articles for exclusion. A team of trained investigators, including but not limited to a faculty  
187 investigator with experience leading systematic reviews (az), a postdoctoral fellow (MP), and  
188 two research staff with Bachelor-level training (VAD, SC), will conduct the manual review. The  
189 research staff and postdoctoral fellow were trained by az to review articles until 90% reliability  
190 was reached between their identification of articles to include and az’s identification of articles to  
191 include. Manual review will begin with title and abstract review. The team of investigators will  
192 screen each article’s title and abstract to identify whether to include or exclude each article based  
193 on the same criteria as the NLP will use. Following, title and abstract review, we will conduct  
194 full-text review of each article, once again screening each article to identify whether to include or  
195 exclude each article based on the same criteria as the prior two steps. In both steps of manual  
196 screening, each article will be reviewed by two investigators. In the case of disagreement, the  
197 article will be re-reviewed by senior members of the team (az and NB) for consensus.



198 *Extraction*

199       Following the multi-step screening process, we will manage and extract data from articles  
200 using COVIDENCE software. Extraction will include identification of high-level information  
201 detailed in Table 1. This will include CDC-identified priority populations, which are based on  
202 disparities in HIV prevalence and incidence in the U.S. Study type will be categorized as within-  
203 site designs (e.g., post-design examination of healthcare processes), between-site designs (e.g.,  
204 comparing a new implementation strategy to usual practice or comparing different  
205 implementation strategies), within- and between-site designs (e.g., roll-out designs), non-  
206 experimental designs (e.g., qualitative designs, surveys that aren't part of a larger trial),  
207 configurational comparative methods (e.g., qualitative comparative analysis, coincidence  
208 analysis), simulation study, or other type of design (44). Implementation outcomes, or “the  
209 effects of deliberate and purposive actions to implement new treatments, practices, and services,”  
210 will be categorized according to the oft-cited Proctor et al. (2011) framework for implementation  
211 outcomes, which includes acceptability, adoption, appropriateness, costs, feasibility, fidelity,  
212 penetration, and sustainability (26). In addition to other extraction variables, we will categorize  
213 structural intervention types using a taxonomy developed by Sipe et al. (2017). These include  
214 interventions aimed at increasing access to an HIV EBI, policy/procedure interventions, the use  
215 of mass media to disseminate an intervention, interventions changing the physical structure  
216 where an HIV EBI is delivered, capacity-building interventions, community mobilization as an  
217 intervention, and interventions targeting SDOH (45). Extraction will be conducted by two  
218 members of the investigative team (VAD, MP, SC) for each article. Consensus for any  
219 discrepancies will be reviewed for final decision making by senior members of the team (az,  
220 NB).

221 *Determinants Coding*

222 Following extraction, articles identified as assessing implementation determinants will be  
223 uploaded to MaxQDA, a qualitative data analysis software, for coding (46). Determinants coding  
224 will focus on barriers and facilitators to implementing the structural intervention, rather than  
225 barriers and facilitators to implementing an HIV EBI. Determinants will be coded according to  
226 valence (i.e., barrier, facilitator, both, neither) and structural intervention type. We will also code  
227 the determinant level; that is, whether the determinant is an innovation determinant or an  
228 implementation determinant. In comparison to implementation determinants, innovation  
229 determinants are barriers or facilitators to patients or other recipients of an EBI access, using,  
230 adhering to, or otherwise receiving the intervention (47). Finally, we will code determinants  
231 using the domains and constructs of the Consolidated Framework for Implementation Research  
232 (CFIR) 2.0 as codes (24,25). CFIR is the most widely-cited compendium (48,49) of  
233 implementation determinants and includes five domains: 1) innovation characteristics (i.e.,  
234 factors about the EBI itself that make it more or less difficult to be delivered); 2) outer setting  
235 (i.e., contextual factors in the larger society or community); 3) inner setting (i.e., contextual  
236 factors within the setting in which an EBI is delivered that make it more or less difficult to do  
237 so); 4) individuals (i.e., whether individuals delivering an EBI have the capability, opportunity,  
238 and motivation to do so); and 5) process (i.e., factors about the actual process of implementing  
239 an EBI that hinder or facilitate delivery, such as engaging patients or adapting the EBI). The  
240 investigative team (VAD, SC, MP) will be trained by a senior team member (az) in use of  
241 MaxQDA and coding of determinants. We will continue training and practice coding until an  
242 interrater reliability of at least  $\kappa = .70$  is reached.

#### 243 *Strategy and adjunctive intervention coding*

244 Following extraction, articles identified as assessing strategies (including implementation  
245 strategies and adjunctive interventions) will be coded in Excel. Coding will be performed of

246 implementation strategies and adjunctive interventions for structural interventions, rather than  
247 implementation strategies and adjunctive interventions for HIV EBIs. The investigative team  
248 (VAD, SC, MP) will be trained by a senior team member (az) in coding of strategies. Each  
249 article will be coded by two investigators who will meet to review their individual coding and  
250 come to consensus on discrepancies. In the case that they cannot come to consensus, a senior  
251 team member (NB) will be brought in to finalize consensus. Strategy coding will begin by  
252 identifying whether the article is examining an implementation strategy or an adjunctive  
253 intervention.

254 Implementation strategy coding will include 1) identification of the discrete strategies, their  
255 names, their temporal order, and their definition/description; 2) differentiation of the structural  
256 intervention and the implementation strategies (if possible); 3) coding of each discrete  
257 implementation strategy to Expert Recommendations for Implementing Change (ERIC)  
258 framework (50); 4) identification of the specific implementation outcomes each discrete strategy  
259 is targeting; 5) identification of the effectiveness of the strategy based on quantitative evidence  
260 of effectiveness in comparison to a control group, baseline, or other comparator; 6) whether the  
261 investigators assess health disparities and/or health equity, with health disparities defined as  
262 identifying a disparity and health equity defined as targeting disparities, including a priority  
263 population, and/or having a community-based study design; 7) identification of the stage of  
264 implementation research (i.e., are they developing, piloting, testing/trialing, and/or comparing  
265 strategies); 7) study design (e.g., observational, within-site); 8) sample size; 9) whether the  
266 investigators use a hybrid approach in the study design (i.e., hybrid implementation-effectiveness  
267 approach (44)); 8) assessment of how well specified each discrete strategy is according to  
268 recommendations by Proctor et al. on a 3-point scale, with each coder rating the level of  
269 specification (0 = no details provided; 1 = very little detail; 2 = there is some detail about

270 components of the strategy but key details are left out; 3 = investigators clearly indicate the  
271 components of the implementation strategy such that it could be replicated (51)); and 9) whether  
272 the authors identified the specific determinants the strategy aims to target.

273 Adjunctive intervention coding will include 1) identification of the discrete components of the  
274 adjunctive intervention (e.g., training, on-going supervision, audit and feedback); 2) description  
275 of the adjunctive intervention components; 3) coding the adjunctive intervention components to  
276 the Theoretical Domains Framework (TDF) and COM-B (52,53); 4) identification of the specific  
277 outcomes each discrete component is targeting (i.e., intervention awareness, acceptability,  
278 feasibility, uptake, adherence, costs, and maintenance, implementation strategy acceptability,  
279 appropriateness, feasibility, and fidelity); 5) whether the investigators assess health disparities  
280 and/or health equity, with health disparities defined as identifying a disparity and health equity  
281 defined as targeting disparities, including a priority population, and/or having a community-  
282 based study design; 6) identification of the effectiveness of the adjunctive intervention based on  
283 quantitative evidence of effectiveness in comparison to a control group, baseline, or other  
284 comparator; 7) identification of the stage of implementation research (i.e., are they developing,  
285 piloting, testing/trialing, and/or comparing adjunctive interventions); 8) study design (e.g.,  
286 observational, within-site); 9) sample size; 10) whether the investigators use a hybrid approach in  
287 the study design (i.e., hybrid implementation-effectiveness approach); 11) assessment of how  
288 well specified each discrete component of the adjunctive intervention is; 12) identification of  
289 who the intervention is delivered to; 13) whether the investigators identify the recipient/patient-  
290 level determinants the adjunctive intervention aims to target.

291 *Analysis*

292 **Determinants.** We will export data to Excel to tabulate the number of discrete determinants  
293 by CFIR constructs. We will further stratify determinants by delivery setting, CDC priority

294 populations, study method, type of structural intervention (45), the particular HIV EBI the  
295 structural intervention is targeting, and implementation outcomes associated with the  
296 determinants. Due to the large amount of data potentially analyzed, we will use NLP to  
297 thematically analyze determinants to provide narrative description of the types of determinants  
298 identified across papers (54).

299 **Strategies and adjunctive interventions.** For implementation strategies and adjunctive  
300 interventions, we will tabulate the number of discrete implementation strategies according to  
301 ERIC strategies and the number of adjunctive intervention components according to TDF and  
302 COM-B constructs. We will further stratify implementation strategies and adjunctive  
303 interventions by study design, stage of research, type of structural intervention (45), the  
304 particular HIV EBI the structural intervention is targeting, delivery setting, the patient or  
305 provider population the implementation strategy or adjunctive intervention is targeting, and  
306 implementation and recipient/patient-level outcomes. We will describe implementation strategy  
307 and adjunctive intervention specification by mean specification rating. We will also tabulate the  
308 number of studies addressing health disparities and/or health equity. We will tabulate the number  
309 of structural interventions that, themselves, are implementation strategies and/or adjunctive  
310 interventions. Due to the large amount of data potentially analyzed, we will use NLP to  
311 thematically analyze strategies and adjunctive interventions to provide narrative description of  
312 the types of strategies and adjunctive interventions identified across papers (54).

### 313 *Dissemination*

314 We will disseminate the results of this systematic review via two primary papers: one focused  
315 on determinants of structural interventions for HIV EBIs and one focused on implementation  
316 strategies and adjunctive interventions for HIV EBIs. We will produce additional qualitative  
317 manuscripts examining determinants, implementation strategies, and adjunctive interventions

318 with greater nuance and depth for specific priority populations (e.g., transgender women) or  
319 specific types of structural interventions (e.g., structural interventions targeting patient access).  
320 We will share out results at research conferences. Finally, we will incorporate the results into a  
321 literature review dashboard (<https://hivimpisci.northwestern.edu/dashboard/>) our team has created  
322 out of previous systematic reviews. This dashboard will provide a high-level visualization of  
323 determinants, implementation strategies, and adjunctive interventions by CFIR, ERIC, the TDF  
324 and COM-B, as well as stratified by HIV EBI, structural intervention type, recipient/patient  
325 population, provider role(s), delivery setting, geographic region of implementation, and  
326 publication year. The dashboard is meant to serve researchers in exploring what has already been  
327 identified by prior research, to aid them in deciding the direction of future research, as well as to  
328 assist them in quickly identifying literature to include in publications and grant submissions.  
329 Further, the dashboard is meant to serve as a tool to implementation practitioners, who may seek  
330 to understand what determinants have been identified in their particular delivery settings or the  
331 population(s) they serve and to identify potential implementation strategies or adjunctive  
332 interventions to implement in their own delivery settings.

### 333 *Timeline*

334 We have thus far completed the initial search and the NLP screening process. We are  
335 currently conducting title and abstract review. Full text review and extraction will begin January  
336 2025 with both analyses beginning June 2025 and running through June 2026. Dissemination  
337 will occur in Fall 2025 through Fall 2026.

### 338 **Discussion**

339 Our systematic review aims to address the critical gap in understanding and targeting the  
340 barriers and facilitators to implementing HIV structural interventions in the U.S and will provide  
341 insights that are essential for guiding efforts to scale up HIV structural interventions.

342 Understanding these implementation determinants, implementation strategies, and adjunctive  
343 interventions is crucial for reaching marginalized populations who continue to face disparities in  
344 access to and engagement with HIV EBIs.

345 Social and economic determinants such as housing stability, transportation, and healthcare  
346 access are critical factors influencing HIV outcomes, particularly for racially, sexually, and  
347 gender minoritized groups, and those with co-occurring conditions including substance misuse,  
348 serious mental illness, and other infectious diseases and chronic conditions which make  
349 treatment engagement more challenging (4,6,19). The implementation strategies and adjunctive  
350 interventions to be identified in this review can inform future policy and program development.  
351 For example, strategies that leverage digital health technologies, patient transportation and  
352 housing, and adaptation of existing EBIs could address systemic barriers such as geographic,  
353 financial, and social/linguistic constraints.

## 354 **Conclusion**

355 By providing a comprehensive analysis of the implementation determinants, implementation  
356 strategies, and adjunctive interventions for HIV structural interventions, our review will identify  
357 existing gaps in the literature and provide researchers with an understanding of the needs of the  
358 field. These findings hold the potential to significantly advance the goals of the Ending the HIV  
359 Epidemic initiative, particularly by addressing the complex needs of populations that have  
360 historically been left behind in the fight against HIV.

## 361 **List of abbreviations**

362 CFIR: The Consolidated Framework for Implementation Research

363 EBI: Evidence based intervention

364 ERIC: Expert Recommendations for Implementation Change

365 GBMSM: Gay, bisexual, and other men who have sex with men

366 IS: Implementation science

367 NLP: Natural language processing

368 PrEP: Pre-exposure prophylaxis

369 PRISMA: Preferred reporting items for systematic reviews and meta-analyses

370 SDOH: Social and structural determinants of health

371 TDF: Theoretical Domains Framework

372 **Declarations**

373 Ethics approval and consent to participate: Not applicable.

374 Consent for publication: Not applicable

375 Availability of data and materials: The datasets used and/or analysed during the current study are  
376 available from the corresponding author on reasonable request.

377 Competing interests: The authors declare that they have no competing interests.

378 Funding: This manuscript is funded by the National Institute for Mental Health, the National  
379 Institute on Drugs Abuse, and the National Institute of Allergy and Infectious Diseases

380 (R24MH134305; PI: Mustanski and Benbow). The content is solely the responsibility of the

381 authors and does not necessarily represent the official views of the National Institutes of Health.

382 The sponsor had no involvement in the conduct of the research or the preparation of the article.

383 The sponsor had no involvement in the conduct of the research or the preparation of the protocol.

384 Author's Contributions: az, VAD, SC, MP, and RP contributed to the writing of the manuscript.

385 az, MH, NB, and BM contributed to the design. All authors reviewed the manuscript.

386 Acknowledgments: The authors would like to thank James Merle who assisted us in designing  
387 the NLP screening strategy. The authors would also like to thank Corinne Miller who provided  
388 consultation on the search strategy.

389



| Table 1. Information to be extracted from articles included in the review |                                                                                                                                                                                                                                                                                                         |
|---------------------------------------------------------------------------|---------------------------------------------------------------------------------------------------------------------------------------------------------------------------------------------------------------------------------------------------------------------------------------------------------|
| Item                                                                      | Definition/Explanation                                                                                                                                                                                                                                                                                  |
| Article Title                                                             | --                                                                                                                                                                                                                                                                                                      |
| Publication Year                                                          | --                                                                                                                                                                                                                                                                                                      |
| First Author's Name                                                       | --                                                                                                                                                                                                                                                                                                      |
| Journal Name                                                              | --                                                                                                                                                                                                                                                                                                      |
| Geographic Setting                                                        | Northeast, West, Midwest, South, U.S. colony, nationwide, simulation, unspecified, or other                                                                                                                                                                                                             |
| Inner Setting <sup>1</sup> Verbatim                                       | Where the intervention is being delivered (e.g., HIV clinic, mobile testing unit)                                                                                                                                                                                                                       |
| Inner Setting Category                                                    | Specialized HIV Clinic, Substance Use Treatment Facility, Non-Specialized Private Clinic or Hospital, Community Health Centers, Pharmacy, Dental Clinic, Hospital System, Community Organization, Church, Prison/Jail, Emergency Department, Labor Unit/Department, Community Level, Legislative Bodies |
| Unit(s) of Analysis                                                       | Patients, providers, policy, non-primary data                                                                                                                                                                                                                                                           |
| Patient Population                                                        | If applicable; Who the paper identifies as their patient population                                                                                                                                                                                                                                     |
| CDC Priority Population                                                   | Cisgender, gay and bisexual Men, African Americans, persons who use drugs, Latines, transgender individuals, cisgender women, adolescents (13-25)                                                                                                                                                       |
| Provider Role Verbatim                                                    | If applicable; Which role the paper identifies as delivering the intervention (e.g., HIV tester)                                                                                                                                                                                                        |
| Provider Role Category                                                    | If applicable; HIV Tester, Physician, Pharmacist, Nurse, Laboratory Personnel, Community Health Worker, Program Leadership/Administration, Administrative Assistant, Policymaker, Peer Navigator, Case Manager, Business Owner, Other                                                                   |
| Higher Level Unit of Analysis                                             | If applicable (e.g., Policymakers, Public Health Department, Nonprofit Organization, Private Entities, Community)                                                                                                                                                                                       |
| HIV Evidence-Based Intervention                                           | PrEP, HIV testing/diagnosis, Linkage to HIV Care, HIV Treatment, nPEP <sup>2</sup> , or other intervention                                                                                                                                                                                              |
| Data Type                                                                 | Qualitative, Quantitative, Mixed/Multi-Method, Simulation, N/A or Not Reported, and Other                                                                                                                                                                                                               |
| Data Collection Method                                                    | Electronic Health/Medical Record, Survey, Surveillance, Participant Observation, Interview, Focus Group, Administrative Data, Policy Analysis, Document Review, Simulation, or Other                                                                                                                    |
| Study Design                                                              | Between-Site; Within- and Between-Site; Non-Experimental; Configurational Comparative Methods; Simulation Study; Other                                                                                                                                                                                  |
| Implementation Variables Studied                                          | Determinants Only, Strategies Only, Both Strategies and Determinants                                                                                                                                                                                                                                    |

|                                   |                                                                                                                                                        |
|-----------------------------------|--------------------------------------------------------------------------------------------------------------------------------------------------------|
| Implementation Outcome            | Appropriateness, Adoption, Acceptability, Feasibility, Cost, Penetration, Sustainability, Other                                                        |
| Implementation Outcome Definition | How do the authors operationalize the implementation outcome                                                                                           |
| Structural Intervention Type      | Access, Policy/Procedure, Mass Media, Physical Structure, Capacity-Building, Community Mobilization, Social Determinants of Health Intervention, Other |
| Structural Intervention Outcome   | Access, Stigma Reduction, Housing, Food Stability, Poverty Alleviation, Use of Sterilized Syringes, Equity, Other                                      |

390 <sup>1</sup> Inner setting is a domain of CFIR, which refers to the setting in which an intervention is  
391 delivered.

392 <sup>2</sup> nPEP refers to nonoccupational post-exposure prophylaxis, an oral pill taken within 72 hours of  
393 exposure to HIV, which, if taken as prescribed, can prevent HIV infection.  
394

395

396

397

## 398 **References**

399 1. Sullivan PS, Satcher Johnson A, Pembleton ES, Stephenson R, Justice AC, Althoff KN, et al.  
400 Epidemiology of HIV in the USA: epidemic burden, inequities, contexts, and responses. *The*  
401 *Lancet*. 2021 Mar 20;397(10279):1095–106.

402 2. Menza TW, Hixson LK, Lipira L, Drach L. Social Determinants of Health and Care  
403 Outcomes Among People With HIV in the United States. *Open Forum Infect Dis*. 2021;8(7).

404 3. World Health Organization. A conceptual framework for action on the social determinants of  
405 health [Internet]. 2010. (Debates, Policy, & Practice, Case Studies). Report No.: 2. Available  
406 from:

407 [https://iris.who.int/bitstream/handle/10665/44489/9789241500852\\_eng.pdf?sequence=1](https://iris.who.int/bitstream/handle/10665/44489/9789241500852_eng.pdf?sequence=1)

408 4. The White House. National HIV/AIDS Strategy for the United States 2022–2025. 2022;  
409 Available from: [https://www.whitehouse.gov/wp-content/uploads/2021/11/National-HIV-](https://www.whitehouse.gov/wp-content/uploads/2021/11/National-HIV-AIDS-Strategy.pdf)  
410 [AIDS-Strategy.pdf](https://www.whitehouse.gov/wp-content/uploads/2021/11/National-HIV-AIDS-Strategy.pdf)

- 411 5. Centers for Disease Control and Prevention. Diagnoses, deaths, and prevalence of HIV in the  
412 United States and 6 territories and freely associated states, 2022 [Internet]. 2024 [cited 2024  
413 Oct 18]. (HIV Surveillance Report). Available from: [http://www.cdc.gov/hiv-data/nhss/hiv-](http://www.cdc.gov/hiv-data/nhss/hiv-diagnoses-deaths-prevalence.html)  
414 [diagnoses-deaths-prevalence.html](http://www.cdc.gov/hiv-data/nhss/hiv-diagnoses-deaths-prevalence.html).
- 415 6. Dasgupta S, McManus T, Tie Y, Lin CYC, Yuan X, Sharpe JD, et al. Comparison of  
416 Demographic Characteristics and Social Determinants of Health Between Adults With  
417 Diagnosed HIV and All Adults in the U.S. *AJPM Focus*. 2023 Sep 1;2(3):100115.
- 418 7. Landovitz RJ, Donnell D, Clement ME, Hanscom B, Cottle L, Coelho L, et al. Cabotegravir  
419 for HIV Prevention in Cisgender Men and Transgender Women. *N Engl J Med*. 2021 Aug  
420 12;385(7):595–608.
- 421 8. Mayer KH, Molina JM, Thompson MA, Anderson PL, Mounzer KC, De Wet JJ, et al.  
422 Emtricitabine and tenofovir alafenamide vs emtricitabine and tenofovir disoproxil fumarate  
423 for HIV pre-exposure prophylaxis (DISCOVER): primary results from a randomised,  
424 double-blind, multicentre, active-controlled, phase 3, non-inferiority trial. *Lancet Lond Engl*.  
425 2020;396:239–54.
- 426 9. Jourdain H, de Gage SB, Desplas D, Dray-Spira R. Real-world effectiveness of pre-exposure  
427 prophylaxis in men at high risk of HIV infection in France: a nested case-control study.  
428 *Lancet Public Health*. 2022 Jun;7(6):e529–36.
- 429 10. Bonacci RA, Smith DK, Ojikutu BO. Toward Greater Pre-exposure Prophylaxis Equity:  
430 Increasing Provision and Uptake for Black and Hispanic/Latino Individuals in the U.S. *Am J*  
431 *Prev Med*. 2021 Nov;61(5 Suppl 1):S60.
- 432 11. Harawa NT, Tan D, Leibowitz AA. Disparities In Uptake Of HIV Pre-exposure Prophylaxis  
433 Among California Medicaid Recipients. *Health Aff (Millwood)*. 2022 Mar;41(3):360–7.

- 434 12. Baugher A, Trujillo L, Kanny D, Freeman J, Hickey T, Sionean C, et al. Racial, Ethnic, and  
435 Gender Disparities in Awareness of Preexposure Prophylaxis Among HIV-Negative  
436 Heterosexually Active Adults at Increased Risk for HIV Infection — 23 Urban Areas, United  
437 States, 2019 [Internet]. 2021 [cited 2024 Oct 18]. (MMWR Morb Mortal Wkly Rep). Report  
438 No.: 70. Available from: <http://dx.doi.org/10.15585/mmwr.mm7047a3>
- 439 13. Cohen MS, Chen YQ, McCauley M, Gamble T, Hosseinipour MC, Kumarasamy N, et al.  
440 Prevention of HIV-1 infection with early antiretroviral therapy. *N Engl J Med*. 2011 Aug  
441 11;365(6):493–505.
- 442 14. Cohen MS, Chen YQ, McCauley M, Gamble T, Hosseinipour MC, Kumarasamy N, et al.  
443 Antiretroviral Therapy for the Prevention of HIV-1 Transmission. *N Engl J Med*. 2016 Sep  
444 1;375(9):830–9.
- 445 15. Cohen MS, Dye C, Fraser C, Miller WC, Powers KA, Williams BG. HIV Treatment as  
446 Prevention: Debate and Commentary—Will Early Infection Compromise Treatment-as-  
447 Prevention Strategies? *PLoS Med*. 2012 Jul 10;9(7):e1001232.
- 448 16. Delva W, Wilson DP, Abu-Raddad L, Gorgens M, Wilson D, Hallett TB, et al. HIV  
449 Treatment as Prevention: Principles of Good HIV Epidemiology Modelling for Public Health  
450 Decision-Making in All Modes of Prevention and Evaluation. *PLoS Med*. 2012 Jul  
451 10;9(7):e1001239.
- 452 17. LeMessurier J, Traversy G, Varsaneux O, Weekes M, Avey MT, Niragira O, et al. Risk of  
453 sexual transmission of human immunodeficiency virus with antiretroviral therapy,  
454 suppressed viral load and condom use: a systematic review. *Can Med Assoc J*. 2018 Nov  
455 19;190(46):E1350–60.
- 456 18. Holmes CB, Hallett TB, Walensky RP, Bärnighausen T, Pillay Y, Cohen MS. Effectiveness  
457 and Cost-Effectiveness of Treatment as Prevention for HIV. In: Holmes KK, Bertozzi S,

- 458 Bloom BR, Jha P, editors. Major Infectious Diseases [Internet]. 3rd ed. Washington (DC):  
459 The International Bank for Reconstruction and Development / The World Bank; 2017 [cited  
460 2024 Oct 18]. Available from: <http://www.ncbi.nlm.nih.gov/books/NBK525180/>
- 461 19. Wood BR, Kassaye SG, Gerstoft J. Long-acting cabotegravir/rilpivirine for HIV-1 treatment:  
462 real-world evaluation of barriers to implementation. *AIDS*. 2023 Mar 15;37(4):689–91.
- 463 20. Centers for Disease Control and Prevention. Ending the HIV Epidemic in the US (EHE).  
464 2024 [cited 2024 Oct 18]. Ending the HIV Epidemic in the US Goals. Available from:  
465 <https://www.cdc.gov/ehe/php/about/goals.html>
- 466 21. Greenwood G, Gaist P, Namkung A, Rausch D. Methodological and Measurement Advances  
467 in Social Determinants of HIV: View from NIH. *AIDS Behav*. 2021 Mar 29;25(Suppl  
468 2):127.
- 469 22. Adimora AA, Auerbach JD. Structural Interventions for HIV Prevention in the United States.  
470 *JAIDS*. 2010 Dec 15;55(Supplement 2):S132–5.
- 471 23. Rubin R. It Takes an Average of 17 Years for Evidence to Change Practice-the Burgeoning  
472 Field of Implementation Science Seeks to Speed Things Up. *JAMA*. 2023 Apr  
473 25;329(16):1333–6.
- 474 24. Damschroder LJ, Reardon CM, Widerquist MAO, Lowery J. The updated Consolidated  
475 Framework for Implementation Research based on user feedback. *Implement Sci*.  
476 2022;17(1):1–16.
- 477 25. Damschroder LJ, Aron DC, Keith RE, Kirsh SR, Alexander JA, Lowery JC. Fostering  
478 implementation of health services research findings into practice: a consolidated framework  
479 for advancing implementation science. *Implement Sci*. 2009;4(1):1–15.

- 480 26. Proctor E, Silmere H, Raghavan R, Hovmand P, Aarons G, Bunger A, et al. Outcomes for  
481 Implementation Research: Conceptual Distinctions, Measurement Challenges, and Research  
482 Agenda. *Adm Policy Ment Health*. 2011;38(2):65–76.
- 483 27. Glasgow RE, Vogt TM, Boles SM. Evaluating the public health impact of health promotion  
484 interventions: the RE-AIM framework. *Am J Public Health*. 1999 Sep;89(9):1322–7.
- 485 28. Smith JD, Li DH, Merle JL, Keiser B, Mustanski B, Benbow ND. Adjunctive interventions:  
486 change methods directed at recipients that support uptake and use of health innovations.  
487 *Implement Sci*. 2024 Feb 8;19(1):10.
- 488 29. Fauci AS. Ending the HIV/AIDS Pandemic: Research and Implementation. *JAIDS*.  
489 2013;62:55.
- 490 30. Hogg RS. Understanding the HIV care continuum. *Lancet HIV*. 2018 Jun 1;5(6):e269–70.
- 491 31. McNairy ML, El-Sadr WM. A Paradigm Shift: Focus on the HIV Prevention Continuum.  
492 *Clin Infect Dis Off Publ Infect Dis Soc Am*. 2014 Jul 1;59(Suppl 1):S12.
- 493 32. Centers for Disease Control and Prevention. Compendium of Evidence-Based Interventions  
494 and Best Practices for HIV Prevention. 2022 [cited 2024 Oct 18]. Structural Interventions  
495 (SI). Available from:  
496 <https://www.cdc.gov/hiv/research/interventionresearch/compendium/si/index.html#:~:text=The%20Structural%20Interventions%20Chapter%20identifies,individual%20risk%20and%20protective%20behaviors>.  
497  
498
- 499 33. Curran GM, Bauer M, Mittman B, Pyne JM, Stetler C. Effectiveness-implementation Hybrid  
500 Designs: Combining Elements of Clinical Effectiveness and Implementation Research to  
501 Enhance Public Health Impact. *Med Care*. 2012 Mar;50(3):217.

- 502 34. R Core Team. R: A language and environment for statistical computing [Internet]. Vienna,  
503 Austria: R Foundation for Statistical Computing; 2021. Available from: [https://www.R-](https://www.R-project.org/)  
504 [project.org/](https://www.R-project.org/)
- 505 35. Benoit K, Watanabe K. quanteda: Quantitative Analysis of Textual Data [Internet]. Available  
506 from: <https://quanteda.io/>
- 507 36. Hornik K, Buchta C, Hothorn T, Karatzoglou A, Meyer D, Zeileis A. RWeka [Internet].  
508 2023. Available from: <https://cran.r-project.org/web/packages/RWeka/index.html>
- 509 37. Wickham H, RStudio. tidyverse: Easily Install and Load the “Tidyverse” [Internet]. 2023.  
510 Available from: <https://cran.r-project.org/web/packages/tidyverse/index.html>
- 511 38. De Quieroz G, Fay C, Hvitfeldt E, Keyes O, Mastny T, Erickson J, et al. tidytext: Text  
512 Mining using “dplyr”, “ggplot2”, and Other Tidy Tools [Internet]. 2024. Available from:  
513 <https://cran.r-project.org/web/packages/tidytext/index.html>
- 514 39. Robinson D, Hayes A, Couch S, Posit Software P, et al. broom: Convert Statistical Objects  
515 into Tidy Tibbles [Internet]. 2024. Available from: [https://cran.r-](https://cran.r-project.org/web/packages/broom/index.html)  
516 [project.org/web/packages/broom/index.html](https://cran.r-project.org/web/packages/broom/index.html)
- 517 40. Wickham H, Hester J, Francois R, Bryan J, Bearrows S, Posit Software P, et al. readr: Read  
518 Rectangular Text Data [Internet]. 2024. Available from: [https://cran.r-](https://cran.r-project.org/web/packages/readr/index.html)  
519 [project.org/web/packages/readr/index.html](https://cran.r-project.org/web/packages/readr/index.html)
- 520 41. Wickham H, Posit Software P. stringr: Simple, Consistent Wrappers for Common String  
521 Operations [Internet]. 2023. Available from: [https://cran.r-](https://cran.r-project.org/web/packages/stringr/index.html)  
522 [project.org/web/packages/stringr/index.html](https://cran.r-project.org/web/packages/stringr/index.html)
- 523 42. Bache S, Wickham H, Henry L, RStudio. magrittr: A Forward-Pipe Operator for R  
524 [Internet]. 2022. Available from: <https://cran.r-project.org/web/packages/magrittr/index.html>

- 525 43. Veritas Health Innovation. Covidence Systematic Review Software [Internet]. Melbourne,  
526 Australia; Available from: <https://support.covidence.org/help/how-can-i-cite-covidence>
- 527 44. Brown CH, Curran G, Palinkas LA, Aarons GA, Wells KB, Jones L, et al. An Overview of  
528 Research and Evaluation Designs for Dissemination and Implementation. *Annu Rev Public*  
529 *Health*. 2017 Mar 20;38:1.
- 530 45. Sipe TA, Barham TL, Johnson W, Joseph H, Tungol-Ashmon ML, O’Leary A. Structural  
531 Interventions in HIV Prevention: A Taxonomy and Descriptive Systematic Review. *AIDS*  
532 *Behav*. 2017 Dec;21(12):3366.
- 533 46. Verbi Software. MaxQDA 2022 [computer software] [Internet]. Berlin, Germany: VERBI  
534 Software; Available from: [maxqda.com](http://maxqda.com)
- 535 47. Damschroder LJ, Reardon CM, Opra Widerquist MA, Lowery J. Conceptualizing outcomes  
536 for use with the Consolidated Framework for Implementation Research (CFIR): the CFIR  
537 Outcomes Addendum. *Implement Sci*. 2022 Jan 22;17(1):7.
- 538 48. Skolarus TA, Lehmann T, Tabak RG, Harris J, Lecy J, Sales AE. Assessing citation  
539 networks for dissemination and implementation research frameworks. *Implement Sci*. 2017  
540 Jul 28;12(1):97.
- 541 49. Kirk MA, Kelley C, Yankey N, Birken SA, Abadie B, Damschroder L. A systematic review  
542 of the use of the Consolidated Framework for Implementation Research. *Implement Sci*.  
543 2016 May 17;11(1):72.
- 544 50. Powell BJ, Waltz TJ, Chinman MJ, Damschroder LJ, Smith JL, Matthieu MM, et al. A  
545 refined compilation of implementation strategies: results from the Expert Recommendations  
546 for Implementing Change (ERIC) project. *Implement Sci*. 2015 Feb 12;10(1):21.
- 547 51. Proctor EK, Powell BJ, McMillen JC. Implementation strategies: recommendations for  
548 specifying and reporting. *Implement Sci*. 2013 Dec 1;8(1):139.



- 549 52. Atkins L, Francis J, Islam R, O'Connor D, Patey A, Ivers N, et al. A guide to using the  
550 Theoretical Domains Framework of behaviour change to investigate implementation  
551 problems. *Implement Sci.* 2017 Jun 21;12(1):77.
- 552 53. Michie S, van Stralen MM, West R. The behaviour change wheel: A new method for  
553 characterising and designing behaviour change interventions. *Implement Sci.* 2011 Apr  
554 23;6(1):42.
- 555 54. Guetterman TC, Chang T, DeJonckheere M, Basu T, Scruggs E, Vydiswaran VV.  
556 Augmenting Qualitative Text Analysis with Natural Language Processing: Methodological  
557 Study. *J Med Internet Res.* 2018 Jun 29;20(6):e231.
- 558
